# Supplementary material
Source: PubMed Central journal article supplement (PMC8404398)
Supplement: mmc1.pdf [file mmc1.pdf]

Table S1: Characteristics and outcomes of community-onset and hospital-onset laboratory-confirmed COVID-19 cases in NHS Mental Health & Learning Disability Trusts (March to August 2020)

|                                        |                         | Hospital patients<br>positive for SARS-<br>CoV-2 | Community-onset<br>community-acquired | Hospital-onset<br>indefinite<br>healthcare-<br>associated | Hospital-onset<br>probable healthcare-<br>associated | Hospital-onset<br>definite healthcare-<br>associated | Community-onset<br>possible healthcare-<br>associated |
|----------------------------------------|-------------------------|--------------------------------------------------|---------------------------------------|-----------------------------------------------------------|------------------------------------------------------|------------------------------------------------------|-------------------------------------------------------|
|                                        |                         | N=2,310                                          | n=539                                 | n=199                                                     | n=320                                                | n=933                                                | n=219                                                 |
| <b>Age (years)</b>                     | 0-39 years              | 229 (9.9%)                                       | 73 (13.5%)                            | 21 (7.0%)                                                 | 21 (6.6%)                                            | 99 (10.6%)                                           | 15 (6.9%)                                             |
|                                        | 40-49 years             | 119 (5.2%)                                       | 48 (8.9%)                             | 10 (3.3%)                                                 | 14 (4.4%)                                            | 41 (4.4%)                                            | 6 (2.7%)                                              |
|                                        | 50-59 years             | 193 (8.4%)                                       | 67 (12.4%)                            | 20 (6.7%)                                                 | 23 (7.2%)                                            | 66 (7.1%)                                            | 17 (7.8%)                                             |
|                                        | 60-69 years             | 269 (11.7%)                                      | 69 (12.8%)                            | 32 (10.7%)                                                | 31 (9.7%)                                            | 111 (11.9%)                                          | 26 (11.9%)                                            |
|                                        | 70-79 years             | 530 (22.9%)                                      | 111 (20.6%)                           | 63 (21.1%)                                                | 67 (20.9%)                                           | 244 (26.2%)                                          | 45 (20.6%)                                            |
|                                        | 80+ years               | 970 (42.0%)                                      | 171 (31.7%)                           | 153 (51.2%)                                               | 164 (51.3%)                                          | 372 (39.9%)                                          | 110 (50.2%)                                           |
| <b>Sex</b>                             | Female                  | 1,094 (47.4%)                                    | 255 (47.3%)                           | 152 (50.8%)                                               | 146 (45.6%)                                          | 440 (47.2%)                                          | 101 (46.1%)                                           |
|                                        | Male                    | 1,216 (52.6%)                                    | 284 (52.7%)                           | 147 (49.2%)                                               | 174 (54.4%)                                          | 493 (52.8%)                                          | 118 (53.9%)                                           |
| <b>Ethnicity</b>                       | White                   | 2,121 (92.6%)                                    | 506 (96.0%)                           | 276 (92.3%)                                               | 292 (91.8%)                                          | 835 (89.9%)                                          | 212 (97.3%)                                           |
|                                        | Black & ethnic minority | 170 (7.4%)                                       | 21 (4.0%)                             | 23 (7.7%)                                                 | 26 (8.2%)                                            | 94 (10.1%)                                           | 6 (2.8%)                                              |
| <b>Charlson score (range 0-16)</b>     | 0                       | 918 (41.2%)                                      | 165 (35.6%)                           | 146 (49.2%)                                               | 130 (40.6%)                                          | 409 (44.0%)                                          | 68 (31.1%)                                            |
|                                        | 1                       | 508 (22.8%)                                      | 121 (26.1%)                           | 64 (21.6%)                                                | 67 (20.9%)                                           | 219 (23.6%)                                          | 37 (16.9%)                                            |
|                                        | 2+                      | 803 (36.0%)                                      | 177 (38.2%)                           | 87 (29.3%)                                                | 123 (38.4%)                                          | 302 (32.5%)                                          | 114 (52.0%)                                           |
| <b>Length of stay (hospital spell)</b> | median (IQR) days       | -                                                | 5 (1-12)                              | 18 (10-34)                                                | 27 (17-47)                                           | 83 (44-231)                                          | 9 (4-21)                                              |
| <b>Length of stay (post-test)</b>      | median (IQR) days       | -                                                | 5 (1-12)                              | 13 (5-28)                                                 | 16 (6-34)                                            | 29 (12-79)                                           | 9 (4-21)                                              |
| <b>Mortality (28 days post-test)</b>   |                         | 518 (22.4%)                                      | 120 (22.4%)                           | 75 (25.1%)                                                | 81 (25.3%)                                           | 193 (20.7%)                                          | 49 (22.4%)                                            |

Table S2: Mortality at 28 days (after first positive SARS-CoV-2 PCR test) by community- or hospital-onset COVID-19 case classification in patients admitted to NHS Acute Trust hospitals (March to August 2020)

| CO.CA              | age (years) | total  | died (28d) | (%)   |
|--------------------|-------------|--------|------------|-------|
| community-onset    | 0-39        | 3,858  | 42         | 1.1%  |
|                    | 40-49       | 6,415  | 276        | 4.3%  |
| community-acquired | 50-59       | 9,316  | 946        | 10.2% |
|                    | 60-64       | 4,635  | 886        | 19.1% |
|                    | 65-69       | 4,140  | 1,103      | 26.6% |
|                    | 70-74       | 4,818  | 1,641      | 34.1% |
|                    | 75-79       | 5,552  | 2,281      | 41.1% |
|                    | 80-84       | 6,504  | 2,999      | 46.1% |
|                    | 85-89       | 5,732  | 2,802      | 48.9% |
| 90+                | 4,668       | 2,565  | 54.9%      |       |
| Total              |             | 60,227 | 15,620     | 25.9% |

| CO.pHA                         | age (years) | total  | died (28d) | (%)   |
|--------------------------------|-------------|--------|------------|-------|
| community-onset                | 0-39        | 1,412  | 41         | 2.9%  |
|                                | 40-49       | 935    | 66         | 7.1%  |
| possible healthcare-associated | 50-59       | 1,548  | 246        | 15.9% |
|                                | 60-64       | 934    | 210        | 22.5% |
|                                | 65-69       | 1,078  | 320        | 29.7% |
|                                | 70-74       | 1,607  | 543        | 33.8% |
|                                | 75-79       | 1,876  | 767        | 40.9% |
|                                | 80-84       | 2,063  | 954        | 46.2% |
|                                | 85-89       | 1,878  | 932        | 49.6% |
| 90+                            | 1,252       | 645    | 51.5%      |       |
| Total                          |             | 14,583 | 4,724      | 32.4% |

| HO.iHA                              | age (years) | total | died (28d) | (%)   |
|-------------------------------------|-------------|-------|------------|-------|
| hospital-onset                      | 0-39        | 517   | 23         | 4.4%  |
|                                     | 40-49       | 496   | 65         | 13.1% |
| indeterminate healthcare-associated | 50-59       | 975   | 180        | 18.5% |
|                                     | 60-64       | 611   | 145        | 23.7% |
|                                     | 65-69       | 683   | 207        | 30.3% |
|                                     | 70-74       | 894   | 308        | 34.5% |
|                                     | 75-79       | 1,070 | 454        | 42.4% |
|                                     | 80-84       | 1,263 | 526        | 41.6% |
|                                     | 85-89       | 1,222 | 598        | 48.9% |
| 90+                                 | 948         | 497   | 52.4%      |       |
| Total                               |             | 8,679 | 3,003      | 34.6% |

| HO.pHA                         | age (years) | total | died (28d) | (%)   |
|--------------------------------|-------------|-------|------------|-------|
| hospital-onset                 | 0-39        | 144   | 12         | 8.3%  |
|                                | 40-49       | 179   | 28         | 15.6% |
| probable healthcare-associated | 50-59       | 398   | 96         | 24.1% |
|                                | 60-64       | 294   | 103        | 35.0% |
|                                | 65-69       | 437   | 148        | 33.9% |
|                                | 70-74       | 708   | 320        | 45.2% |
|                                | 75-79       | 829   | 375        | 45.2% |
|                                | 80-84       | 1,148 | 551        | 48.0% |
|                                | 85-89       | 1,256 | 643        | 51.2% |
| 90+                            | 1,042       | 564   | 54.1%      |       |
| Total                          |             | 6,435 | 2,840      | 44.1% |

| HO.HA                          | age (years) | total | died (28d) | (%)   |
|--------------------------------|-------------|-------|------------|-------|
| hospital-onset                 | 0-39        | 268   | 12         | 4.5%  |
|                                | 40-49       | 238   | 31         | 13.0% |
| definite healthcare-associated | 50-59       | 542   | 118        | 21.8% |
|                                | 60-64       | 396   | 114        | 28.8% |
|                                | 65-69       | 529   | 180        | 34.0% |
|                                | 70-74       | 798   | 306        | 38.3% |
|                                | 75-79       | 999   | 417        | 41.7% |
|                                | 80-84       | 1,357 | 594        | 43.8% |
|                                | 85-89       | 1,346 | 637        | 47.3% |
| 90+                            | 967         | 477   | 49.3%      |       |
| Total                          |             | 7,440 | 2,886      | 38.8% |

| HO.pHA and HO.HA               | age (years) | total  | died (28d) | (%)   |
|--------------------------------|-------------|--------|------------|-------|
| hospital-onset                 | 0-39        | 412    | 24         | 5.8%  |
|                                | 40-49       | 417    | 59         | 14.1% |
| definite healthcare-associated | 50-59       | 940    | 214        | 22.8% |
|                                | 60-64       | 690    | 217        | 31.4% |
|                                | 65-69       | 966    | 328        | 34.0% |
|                                | 70-74       | 1,506  | 626        | 41.6% |
|                                | 75-79       | 1,828  | 792        | 43.3% |
|                                | 80-84       | 2,505  | 1,145      | 45.7% |
|                                | 85-89       | 2,602  | 1,280      | 49.2% |
| 90+                            | 2,009       | 1,041  | 51.8%      |       |
| Total                          |             | 13,875 | 5,726      | 41.3% |
